# Supplementary material for: Characterization of the Moroccan Barley Germplasm Preserved in the Polish Genebank as a First Step towards Selecting Forms with Increased Drought Tolerance
Source: MDPI journal article supplement (doi:10.3390/ijms242216350), 2023-11-15
Supplement: s1 [file s1]

**Table 1.** Results of ANOVA analysis for eco-geographical data of the origin sites of barley landraces from Morocco

|             |                 | Annual |                |              |       |          | Growing season |              |       |          |
|-------------|-----------------|--------|----------------|--------------|-------|----------|----------------|--------------|-------|----------|
|             | Source          | DF     | Sum of squares | Mean squares | F     | Pr > F   | Sum of squares | Mean squares | F     | Pr > F   |
| <b>tmax</b> | Model           | 46     | 1993.24        | 43.33        | 1.03  | 0.427    | 1963.69        | 42.69        | 1.01  | 0.455    |
|             | Error           | 516    | 21772.50       | 42.19        |       |          | 21778.91       | 42.21        |       |          |
|             | Corrected Total | 562    | 23765.74       |              |       |          | 23742.60       |              |       |          |
| <b>tmin</b> | Model           | 46     | 3778.22        | 82.14        | 2.81  | < 0.0001 | 3744.01        | 81.39        | 2.78  | < 0.0001 |
|             | Error           | 516    | 15105.71       | 29.27        |       |          | 15102.43       | 29.27        |       |          |
|             | Corrected Total | 562    | 18883.93       |              |       |          | 18846.44       |              |       |          |
| <b>ppt</b>  | Model           | 46     | 103818.21      | 2256.92      | 2.85  | < 0.0001 | 103728.36      | 2254.96      | 2.84  | < 0.0001 |
|             | Error           | 516    | 408585.25      | 791.83       |       |          | 409690.66      | 793.97       |       |          |
|             | Corrected Total | 562    | 512403.46      |              |       |          | 513419.02      |              |       |          |
| <b>def</b>  | Model           | 46     | 136703.03      | 2971.80      | 0.58  | 0.989    | 136307.09      | 2963.20      | 0.58  | 0.989    |
|             | Error           | 516    | 2655331.94     | 5145.99      |       |          | 2658576.84     | 5152.28      |       |          |
|             | Corrected Total | 562    | 2792034.96     |              |       |          | 2794883.93     |              |       |          |
| <b>pdsi</b> | Model           | 46     | 4.12           | 0.09         | 3.28  | < 0.0001 | 4.14           | 0.09         | 3.29  | < 0.0001 |
|             | Error           | 516    | 14.11          | 0.03         |       |          | 14.12          | 0.03         |       |          |
|             | Corrected Total | 562    | 18.23          |              |       |          | 18.26          |              |       |          |
| <b>srad</b> | Model           | 46     | 21000.18       | 456.53       | 0.11  | 1.000    | 22392.52       | 486.79       | 0.12  | 1.000    |
|             | Error           | 516    | 2092940.12     | 4056.09      |       |          | 2089550.35     | 4049.52      |       |          |
|             | Corrected Total | 562    | 2113940.30     |              |       |          | 2111942.87     |              |       |          |
| <b>pet</b>  | Model           | 46     | 68741.81       | 1494.39      | 0.47  | 0.999    | 68938.89       | 1498.67      | 0.47  | 0.999    |
|             | Error           | 516    | 1640196.08     | 3178.67      |       |          | 1640006.40     | 3178.31      |       |          |
|             | Corrected Total | 562    | 1708937.88     |              |       |          | 1708945.29     |              |       |          |
| <b>q</b>    | Model           | 46     | 22677.62       | 492.99       | 3.97  | < 0.0001 | 22668.29       | 492.79       | 3.97  | < 0.0001 |
|             | Error           | 516    | 64045.25       | 124.12       |       |          | 64087.65       | 124.20       |       |          |
|             | Corrected Total | 562    | 86722.87       |              |       |          | 86755.93       |              |       |          |
| <b>soil</b> | Model           | 46     | 182725.14      | 3972.29      | 27.31 | < 0.0001 | 182798.60      | 3973.88      | 27.32 | < 0.0001 |
|             | Error           | 516    | 75054.65       | 145.45       |       |          | 75051.98       | 145.45       |       |          |
|             | Corrected Total | 562    | 257779.79      |              |       |          | 257850.58      |              |       |          |
| <b>ws</b>   | Model           | 46     | 95.81          | 2.08         | 10.14 | < 0.0001 | 95.78          | 2.08         | 10.17 | < 0.0001 |
|             | Error           | 516    | 105.95         | 0.21         |       |          | 105.67         | 0.20         |       |          |
|             | Corrected Total | 562    | 201.76         |              |       |          | 201.45         |              |       |          |
| <b>aet</b>  | Model           | 46     | 34782.31       | 756.14       | 2.05  | 0.000    | 34671.34       | 753.72       | 2.04  | 0.000    |
|             | Error           | 516    | 190296.89      | 368.79       |       |          | 191036.84      | 370.23       |       |          |
|             | Corrected Total | 562    | 225079.21      |              |       |          | 225708.18      |              |       |          |

Computed against model  $Y = \text{Mean}(Y)$ , tmax - Maximum Temperature, tmin - Minimum Temperature, aet - Actual Evapotranspiration, def - Climate Water Deficit, pet - Grass Reference Evapotranspiration, ppt - Precipitation, PDSI - Palmer Drought Severity Index, srad - Downward Solar Radiation Flux at the Surface, q - Water Runoff, soil - Soil Moisture, ws - Wind Speed,

**Table S2.** Homogeneous groups based on ANOVA and Tukey's HSD post-hoc test

| Accession | tmin | ppt  | pdsi | q    | soil | ws    | aet   |
|-----------|------|------|------|------|------|-------|-------|
| PL 40414  | ABC  | CD   | ABC  | DE   | DE   | CDE   | ABCDE |
| PL 40672  | ABC  | CD   | ABC  | DE   | DE   | CDE   | ABCDE |
| PL 40777  | ABC  | CD   | ABC  | DE   | DE   | CDE   | ABCDE |
| PL 40979  | BC   | BCD  | ABC  | CDE  | DE   | BCDE  | ABCDE |
| PL 40980  | BC   | BCD  | ABC  | CDE  | DE   | BCDE  | ABCDE |
| PL 40981  | A    | D    | ABC  | E    | E    | ABCDE | E     |
| PL 40982  | AB   | D    | ABC  | E    | E    | ABC   | E     |
| PL 40983  | ABC  | CD   | ABC  | DE   | DE   | CDE   | ABCDE |
| PL 42378  | ABC  | CD   | ABC  | DE   | DE   | AB    | DE    |
| PL 42379  | A    | D    | ABC  | E    | E    | DE    | E     |
| PL 42380  | ABC  | CD   | ABC  | E    | DE   | CDE   | BCDE  |
| PL 42593  | ABC  | CD   | ABC  | E    | DE   | DE    | DE    |
| PL 42594  | BC   | BCD  | ABC  | CDE  | DE   | CDE   | ABCDE |
| PL 42595  | ABC  | BCD  | ABC  | CDE  | DE   | CDE   | ABCDE |
| PL 42694  | ABC  | BCD  | ABC  | CDE  | DE   | CDE   | ABCDE |
| PL 42735  | ABC  | BCD  | ABC  | CDE  | DE   | CDE   | ABCDE |
| PL 42736  | ABC  | BCD  | ABC  | CDE  | DE   | CDE   | ABCDE |
| PL 42737  | ABC  | BCD  | ABC  | CDE  | DE   | CDE   | ABCDE |
| PL 42738  | ABC  | BCD  | ABC  | CDE  | DE   | CDE   | ABCDE |
| PL 42739  | ABC  | BCD  | ABC  | CDE  | DE   | CDE   | ABCDE |
| PL 42740  | ABC  | BCD  | ABC  | CDE  | DE   | CDE   | ABCDE |
| PL 42741  | ABC  | CD   | ABC  | DE   | DE   | BCDE  | ABCDE |
| PL 42742  | BC   | BCD  | ABC  | CDE  | DE   | CDE   | ABCDE |
| PL 42743  | BC   | CD   | ABC  | E    | DE   | CDE   | DE    |
| PL 42744  | ABC  | BCD  | ABC  | CDE  | D    | E     | ABCDE |
| PL 42745  | ABC  | BCD  | ABC  | CDE  | DE   | CDE   | ABCDE |
| PL 42747  | ABC  | BCD  | ABC  | BCDE | DE   | E     | ABCDE |
| PL 42748  | ABC  | BCD  | ABC  | BCDE | DE   | DE    | ABCDE |
| PL 42749  | ABC  | AB   | C    | ABCD | AB   | E     | A     |
| PL 42750  | ABC  | AB   | BC   | ABC  | B    | DE    | AB    |
| PL 42751  | BC   | BCD  | ABC  | CDE  | DE   | ABCD  | ABCDE |
| PL 42752  | ABC  | CD   | ABC  | DE   | DE   | AB    | CDE   |
| PL 42753  | ABC  | CD   | ABC  | DE   | DE   | AB    | DE    |
| PL 42754  | ABC  | BCD  | ABC  | CDE  | DE   | CDE   | ABCDE |
| PL 42755  | A    | D    | ABC  | E    | DE   | A     | E     |
| PL 42756  | C    | BCD  | ABC  | CDE  | DE   | CDE   | ABCDE |
| PL 42757  | ABC  | CD   | ABC  | E    | DE   | CDE   | ABCDE |
| PL 42759  | ABC  | CD   | ABC  | E    | DE   | CDE   | ABCDE |
| PL 42760  | ABC  | CD   | ABC  | E    | DE   | CDE   | ABCDE |
| PL 42761  | ABC  | ABC  | ABC  | BCDE | DE   | DE    | ABCD  |
| PL 42762  | ABC  | BCD  | ABC  | CDE  | DE   | DE    | ABCDE |
| PL 42763  | ABC  | ABCD | ABC  | BCDE | D    | DE    | ABCD  |
| PL 42764  | ABC  | BCD  | C    | CDE  | DE   | E     | ABCDE |
| PL 42765  | ABC  | ABCD | ABC  | BCDE | DE   | E     | ABCDE |
| PL 42766  | AB   | CD   | AB   | E    | DE   | ABCD  | ABCDE |
| PL 42767  | ABC  | AB   | A    | AB   | C    | ABC   | ABCD  |
| PL 42772  | ABC  | A    | ABC  | A    | A    | BCDE  | ABC   |

tmin - Minimum Temperature, ppt - Precipitation, pdsi - Palmer Drought Severity Index, q - Water Runoff, soil – Soil Moisture, ws - Wind Speed.

**Table S3.** Results of the correlation analysis of eco-geographical parameters during the growing season in the origin sites of barley landraces in Morocco.

| Variables | tmin          | ppt          | PDSI         | q            | soil         | ws            | aet   | alt |
|-----------|---------------|--------------|--------------|--------------|--------------|---------------|-------|-----|
| tmin      | 1             |              |              |              |              |               |       |     |
| ppt       | -0.079        | 1            |              |              |              |               |       |     |
| PDSI      | <b>-0.395</b> | -0.106       | 1            |              |              |               |       |     |
| q         | 0.055         | <b>0.956</b> | -0.044       | 1            |              |               |       |     |
| soil      | 0.147         | <b>0.872</b> | -0.043       | <b>0.889</b> | 1            |               |       |     |
| ws        | 0.096         | -0.285       | 0.228        | -0.136       | -0.117       | 1             |       |     |
| aet       | -0.219        | <b>0.953</b> | -0.157       | <b>0.823</b> | <b>0.762</b> | <b>-0.414</b> | 1     |     |
| alt       | <b>-0.811</b> | 0.055        | <b>0.329</b> | -0.055       | -0.208       | -0.217        | 0.177 | 1   |

Values in bold are different from 0 with a significance level  $\alpha=0.05$ , tmin - Minimum Temperature, aet - Actual Evapotranspiration, ppt - Precipitation, PDSI - Palmer Drought Severity Index, q - Water Runoff, soil - Soil Moisture, ws - Wind Speed, alt - Altitude of a collection site.

**Table S4.** Correlation analysis results of grain morphometric parameters for 64 Moroccan accessions.

| Variables | area         | perimeter    | length | width        | grain ch1    | grain ch2    | grain ch3 |
|-----------|--------------|--------------|--------|--------------|--------------|--------------|-----------|
| area      | 1            |              |        |              |              |              |           |
| perimeter | <b>0.907</b> | 1            |        |              |              |              |           |
| length    | <b>0.921</b> | <b>0.966</b> | 1      |              |              |              |           |
| width     | <b>0.363</b> | 0.009        | -0.013 | 1            |              |              |           |
| grain ch1 | <b>0.251</b> | -0.009       | 0.154  | <b>0.376</b> | 1            |              |           |
| grain ch2 | 0.219        | -0.008       | 0.147  | <b>0.315</b> | <b>0.977</b> | 1            |           |
| grain ch3 | 0.000        | -0.155       | -0.036 | 0.182        | <b>0.833</b> | <b>0.911</b> | 1         |

Values in bold are different from 0 with a significance level  $\alpha=0.05$ , tmin - Minimum Temperature, aet - Actual Evapotranspiration, ppt - Precipitation, PDSI - Palmer Drought Severity Index, q - Water Runoff, soil - Soil Moisture, ws - Wind Speed, alt - Altitude of a collection site.

**Table 1.** Summary of DArTseq loci distribution on chromosomes for 63 Moroccan barley accessions. Chromosome lengths according to barley genome assembly: IBSC\_v2 [50].

|       | no. Loci | Length [Mbp] | Mean distance [Mbp] | mean PIC |
|-------|----------|--------------|---------------------|----------|
| 1H    | 1153     | 558.54       | 0.48                | 0.25     |
| 2H    | 1686     | 768.08       | 0.46                | 0.26     |
| 3H    | 1585     | 699.71       | 0.44                | 0.28     |
| 4H    | 1044     | 647.06       | 0.62                | 0.27     |
| 5H    | 1604     | 670.03       | 0.42                | 0.25     |
| 6H    | 1154     | 583.38       | 0.51                | 0.26     |
| 7H    | 1511     | 657.22       | 0.43                | 0.25     |
| Total | 9737     | 4584.02      | 0.47                | 0.26     |

**Table S6.** Separate xlsx file.

**Table S7.** Summary of unique alleles by chromosome based on DArTseq analysis of 63 Moroccan barley accession and under extreme and significantly different environmental conditions at the collection sites.

| Variables   | Abundance on chromosomes |    |    |    |    |    |    | Total |
|-------------|--------------------------|----|----|----|----|----|----|-------|
|             | 1H                       | 2H | 3H | 4H | 5H | 6H | 7H |       |
| <b>tmin</b> | 12                       | 14 | 11 | 4  | 12 | 14 | 9  | 76    |
| <b>ppt</b>  | 20                       | 20 | 23 | 17 | 19 | 25 | 23 | 147   |
| <b>PDSI</b> | 10                       | 18 | 16 | 16 | 16 | 38 | 15 | 129   |
| <b>q</b>    | 0                        | 4  | 1  | 1  | 0  | 2  | 4  | 12    |
| <b>soil</b> | 20                       | 26 | 23 | 19 | 20 | 30 | 26 | 164   |
| <b>ws</b>   | 0                        | 7  | 1  | 1  | 2  | 2  | 2  | 15    |
| <b>aet</b>  | 5                        | 5  | 9  | 4  | 11 | 3  | 5  | 42    |
| <b>alt</b>  | 0                        | 1  | 1  | 0  | 4  | 1  | 0  | 7     |

tmin - Minimum Temperature, ppt - Precipitation, PDSI - Palmer Drought Severity Index, q - Water Runoff, soil - Soil Moisture, ws - Wind Speed, alt – Altitude of a collection site.
